# Supplementary material for: Cyprinid herpesvirus 3 Evolves In Vitro through an Assemblage of Haplotypes that Alternatively Become Dominant or Under-Represented
Source: PubMed Central journal article supplement (PMC6723609; doi:10.3390/v11080754), 2019-08-15
Supplement: viruses-11-00754-s001.pdf [file viruses-11-00754-s001.pdf]

**Table S 1.** Nature and position of variants between P78 and P0.

| #  | Position on KHV-J Reference | Reference Sequence | Alternate Sequence                                            | Type of Variation  | Predicted ORF       | P78-1c                  |                         | P78-2c                  |                         | P78-1s                  |                         | P78-2s                  |                         |
|----|-----------------------------|--------------------|---------------------------------------------------------------|--------------------|---------------------|-------------------------|-------------------------|-------------------------|-------------------------|-------------------------|-------------------------|-------------------------|-------------------------|
|    |                             |                    |                                                               |                    |                     | Allele Freq – Reference | Allele Freq – Alternate | Allele Freq – Reference | Allele Freq – Alternate | Allele Freq – Reference | Allele Freq – Alternate | Allele Freq – Reference | Allele Freq – Alternate |
| 1  | 17848                       | C                  | G                                                             | missense variant   | KHVJ011             | 0.80                    | 0.20                    | 0.75                    | 0.25                    | 0.76                    | 0.24                    | 0.72                    | 0.28                    |
| 2  | 17849                       | G                  | A                                                             | missense variant   | KHVJ011             | 0.80                    | 0.20                    | 0.74                    | 0.26                    | 0.78                    | 0.22                    | 0.73                    | 0.27                    |
| 3  | 17850                       | C                  | G                                                             | synonymous variant | KHVJ011             | 0.80                    | 0.20                    | 0.74                    | 0.26                    | 0.79                    | 0.21                    | 0.74                    | 0.26                    |
| 4  | 26023                       | G                  | A                                                             | missense variant   | KHVJ019             | 0.56                    | 0.44                    | 0.60                    | 0.40                    | 0.55                    | 0.45                    | 0.54                    | 0.46                    |
| 5  | 34507                       | T                  | TC                                                            | frameshift variant | KHVJ024             | 0.62                    | 0.38                    | 0.65                    | 0.35                    | 0.63                    | 0.37                    | 0.62                    | 0.38                    |
| 6  | 83069                       | C                  | CCGAAG<br>CAGCCG<br>AAGCAG<br>CCGAAG<br>CAGCCG<br>AAGCAG<br>A | inframe insertion  | KHVJ055             | 0.78                    | 0.22                    | 0.85                    | 0.15                    | 0.72                    | 0.28                    | 0.79                    | 0.21                    |
| 7  | 124200                      | AGGGG              | A                                                             | intergenic variant | KHVJ075-<br>KHVJ076 | 0.38                    | 0.63                    | 0.40                    | 0.60                    | 0.62                    | 0.38                    | 0.31                    | 0.69                    |
| 8  | 138300                      | C                  | A                                                             | missense variant   | KHVJ082             | 0.00                    | 1.00                    | 0.00                    | 1.00                    | 0.00                    | 1.00                    | 0.00                    | 1.00                    |
| 9  | 154881                      | G                  | T                                                             | synonymous variant | KHVJ093             | 0.82                    | 0.18                    | 0.85                    | 0.15                    | 0.86                    | 0.14                    | 0.83                    | 0.17                    |
| 10 | 157768                      | C                  | A                                                             | missense variant   | KHVJ095             | 0.10                    | 0.90                    | 0.08                    | 0.92                    | 0.11                    | 0.89                    | 0.09                    | 0.91                    |
| 11 | 187878                      | GTCT               | G                                                             | inframe deletion   | KHVJ111             | 0.87                    | 0.13                    | 0.91                    | 0.09                    | 0.87                    | 0.13                    | 0.90                    | 0.10                    |

|    |        |                |                                                                                                                               |                    |                     |      |      |      |      |      |      |      |      |
|----|--------|----------------|-------------------------------------------------------------------------------------------------------------------------------|--------------------|---------------------|------|------|------|------|------|------|------|------|
| 12 | 193352 | G              | A                                                                                                                             | missense variant   | KHVJ113/<br>KHVJ114 | 0.66 | 0.34 | 0.63 | 0.37 | 0.60 | 0.40 | 0.65 | 0.35 |
| 13 | 209653 | A              | T                                                                                                                             | missense variant   | KHVJ125             | 0.65 | 0.35 | 0.62 | 0.38 | 0.56 | 0.44 | 0.55 | 0.45 |
| 14 | 223325 | A              | C                                                                                                                             | missense variant   | KHVJ138             | 0.00 | 1.00 | 0.00 | 1.00 | 0.00 | 1.00 | 0.00 | 1.00 |
| 15 | 256979 | C              | T                                                                                                                             | missense variant   | KHVJ159             | 0.00 | 1.00 | 0.00 | 1.00 | 0.00 | 1.00 | 0.00 | 1.00 |
| 16 | 257090 | C              | T                                                                                                                             | missense variant   | KHVJ159             | 0.00 | 1.00 | 0.00 | 1.00 | 0.00 | 1.00 | 0.00 | 1.00 |
| 17 | 258111 | C              | T                                                                                                                             | intergenic variant | KHVJ159-<br>KHVJ160 | 0.26 | 0.74 | 0.27 | 0.73 | 0.32 | 0.68 | 0.36 | 0.64 |
| 18 | 259695 | CG             | C                                                                                                                             | frameshift variant | KHVJ160             | 0.69 | 0.31 | 0.73 | 0.27 | 0.67 | 0.33 | 0.67 | 0.33 |
| 19 | 269057 | TTCC           | T                                                                                                                             | inframe deletion   | KHVJ166             | 0.66 | 0.34 | 0.59 | 0.41 | 0.61 | 0.39 | 0.45 | 0.55 |
| 20 | 270260 | AGAGGC<br>AGAG | A                                                                                                                             | inframe deletion   | KHVJ166/<br>KHVJ167 | 0.73 | 0.27 | 0.71 | 0.29 | 0.71 | 0.29 | 0.72 | 0.28 |
| 21 | 272753 | T              | TGGTGGA<br>AGGTTGA<br>ACATGGT<br>GGACAC.<br>TGGTGGA<br>AGGTTGA<br>ACATGGT<br>GGACAC<br>GGTGGA<br>AGGTTGA<br>ACATGGT<br>GGACAC | frameshift variant | KHVJ169             | 0.59 | 0.41 | 0.28 | 0.72 | 0.50 | 0.50 | 0.38 | 0.62 |

---

All variations located in the terminal repeats appear only once. Predicted ORFs were deduced from the genome annotation of KHV-J (AP008984). Missense variant indicates a nucleotide substitution that modifies the amino acid; synonymous variant denotes a nucleotide substitution that does not modify the amino acid; frameshift variant indicates

an insertion or a deletion that changes the reading frame; intergenic variant points to a mutation located between two predicted open reading frames. When more than two variants co-occur at a single position, only the frequency of the most abundant alternate (from all replicates) is indicated. Only variations <100 bp were listed.

**Table S 2.** Nature and position of variants between P99 and P0.

| #  | Position on<br>KHV-J<br>Reference | Reference<br>Sequence | Alternate<br>Sequence | Type of<br>Variation  | Predicted<br>ORF    | P99-1c                     |                            | P99-2c                     |                            |
|----|-----------------------------------|-----------------------|-----------------------|-----------------------|---------------------|----------------------------|----------------------------|----------------------------|----------------------------|
|    |                                   |                       |                       |                       |                     | Allele Freq<br>– Reference | Allele Freq<br>– Alternate | Allele Freq<br>– Reference | Allele Freq<br>– Alternate |
| 1  | 7090                              | C                     | CA                    | intergenic<br>variant | KHVJ04-<br>KHVJ05   | 0.00                       | 1.00                       | 0.00                       | 1.00                       |
| 2  | 7300                              | C                     | A                     | missense<br>variant   | KHVJ05              | 0.00                       | 1.00                       | 0.00                       | 1.00                       |
| 3  | 8635                              | GAGCACC               | G                     | inframe<br>deletion   | KHVJ06              | 0.00                       | 1.00                       | 0.00                       | 1.00                       |
| 4  | 8926                              | G                     | T                     | missense<br>variant   | KHVJ06              | 0.00                       | 1.00                       | 0.00                       | 1.00                       |
| 5  | 8963                              | GC                    | G                     | frameshift<br>variant | KHVJ06              | 0.00                       | 1.00                       | 0.00                       | 1.00                       |
| 6  | 9201                              | G                     | A                     | missense<br>variant   | KHVJ06              | 0.00                       | 1.00                       | 0.00                       | 1.00                       |
| 7  | 9709                              | T                     | C                     | missense<br>variant   | KHVJ06              | 0.00                       | 1.00                       | 0.00                       | 1.00                       |
| 8  | 11333                             | A                     | ATC                   | intergenic<br>variant | KHVJ06-<br>KHVJ07   | 0.00                       | 1.00                       | 0.03                       | 0.97                       |
| 9  | 22308                             | AAATTAGGG<br>CTAG     | A                     | intergenic<br>variant | KHVJ015-<br>KHVJ016 | 0.84                       | 0.16                       | 0.00                       | 1.00                       |
| 10 | 23622                             | T                     | C                     | synonymous<br>variant | KHVJ017             | 0.88                       | 0.12                       | 0.82                       | 0.18                       |
| 11 | 24969                             | C                     | CCAA                  | inframe<br>insertion  | KHVJ018             | 0.88                       | 0.12                       | 0.90                       | 0.10                       |
| 12 | 31414                             | ACT                   | A                     | frameshift<br>variant | KHVJ023             | 0.66                       | 0.34                       | 0.86                       | 0.14                       |

|    |        |         |      |                       |                     |      |      |      |      |
|----|--------|---------|------|-----------------------|---------------------|------|------|------|------|
| 13 | 37042  | C       | CTGT | inframe<br>insertion  | KHVJ026             | 0.90 | 0.10 | 0.70 | 0.30 |
| 14 | 51203  | G       | GACA | intergenic<br>variant | KHVJ037-<br>KHVJ038 | 0.01 | 0.99 | 0.89 | 0.11 |
| 15 | 62988  | CT      | C    | intergenic<br>variant | KHVJ049-<br>KHVJ050 | 0.00 | 1.00 | 0.00 | 1.00 |
| 16 | 83669  | G       | C    | missense<br>variant   | KHVJ056             | 0.74 | 0.26 | 0.01 | 0.99 |
| 17 | 85005  | TG      | T    | intergenic<br>variant | KHVJ057-<br>KHVJ058 | 0.71 | 0.29 | 0.65 | 0.35 |
| 18 | 104329 | C       | T    | missense<br>variant   | KHVJ070             | 0.87 | 0.13 | 0.73 | 0.27 |
| 19 | 104341 | T       | C    | missense<br>variant   | KHVJ070             | 0.84 | 0.16 | 0.84 | 0.16 |
| 20 | 104472 | T       | G    | missense<br>variant   | KHVJ070             | 0.79 | 0.21 | 0.81 | 0.19 |
| 21 | 105490 | C       | T    | missense<br>variant   | KHVJ070             | 0.68 | 0.32 | 0.73 | 0.27 |
| 22 | 112097 | C       | G    | missense<br>variant   | KHVJ071             | 0.84 | 0.16 | 0.68 | 0.32 |
| 23 | 124125 | CTT     | C    | intergenic<br>variant | KHVJ075-<br>KHVJ076 | 0.16 | 0.84 | 0.76 | 0.24 |
| 24 | 124140 | GT      | G    | intergenic<br>variant | KHVJ075-<br>KHVJ076 | 0.14 | 0.86 | 0.10 | 0.90 |
| 25 | 124200 | AGGGGGG | A.AG | intergenic<br>variant | KHVJ075-<br>KHVJ076 | 0.06 | 0.65 | 0.11 | 0.89 |
| 26 | 138300 | C       | A    | missense<br>variant   | KHVJ082             | 0.00 | 1.00 | 0.08 | 0.64 |
| 27 | 151633 | GT      | G    | intergenic<br>variant | KHVJ090-<br>KHVJ091 | 0.90 | 0.10 | 0.00 | 1.00 |
| 28 | 151649 | T       | TA   | intergenic<br>variant | KHVJ090-<br>KHVJ091 | 0.90 | 0.10 | 0.89 | 0.11 |

|    |        |         |            |                       |                     |      |      |      |      |
|----|--------|---------|------------|-----------------------|---------------------|------|------|------|------|
| 29 | 151780 | G       | GTGA       | intergenic<br>variant | KHVJ090-<br>KHVJ091 | 0.89 | 0.11 | 0.88 | 0.12 |
| 30 | 152587 | G       | A          | missense<br>variant   | KHVJ091             | 0.84 | 0.16 | 0.87 | 0.13 |
| 31 | 158882 | C       | G          | missense<br>variant   | KHVJ096             | 0.78 | 0.22 | 0.90 | 0.10 |
| 32 | 159828 | G       | T          | missense<br>variant   | KHVJ096             | 0.00 | 1.00 | 0.79 | 0.21 |
| 33 | 187878 | GTCT    | G          | inframe<br>deletion   | KHVJ111             | 0.22 | 0.78 | 0.00 | 1.00 |
| 34 | 205798 | ACTT    | A          | inframe<br>deletion   | KHVJ123             | 0.34 | 0.66 | 0.14 | 0.86 |
| 35 | 216278 | T       | TCAACAGCAG | inframe<br>insertion  | KHVJ131             | 0.00 | 1.00 | 0.29 | 0.71 |
| 36 | 223325 | A       | C          | missense<br>variant   | KHVJ138             | 0.00 | 1.00 | 0.00 | 1.00 |
| 37 | 226260 | A       | C          | missense<br>variant   | KHVJ140             | 0.00 | 1.00 | 0.00 | 1.00 |
| 38 | 230658 | C       | A          | missense<br>variant   | KHVJ144             | 0.00 | 1.00 | 0.00 | 1.00 |
| 39 | 247692 | G       | C          | synonymous<br>variant | KHVJ153             | 0.03 | 0.97 | 0.00 | 1.00 |
| 40 | 253848 | C       | CGCT       | inframe<br>insertion  | KHVJ157             | 0.00 | 1.00 | 0.03 | 0.97 |
| 41 | 257090 | C       | T          | missense<br>variant   | KHVJ159             | 0.00 | 1.00 | 0.00 | 1.00 |
| 42 | 258111 | C       | T          | intergenic<br>variant | KHVJ159-<br>KHVJ160 | 0.00 | 1.00 | 0.00 | 1.00 |
| 43 | 265700 | TTGC    | T          | inframe<br>insertion  | KHVJ165             | 0.87 | 0.13 | 0.00 | 1.00 |
| 44 | 269057 | TTCCTCC | T          | inframe<br>insertion  | KHVJ166             | 0.00 | 1.00 | 0.84 | 0.16 |

|    |        |                              |            |                       |                     |      |      |      |      |
|----|--------|------------------------------|------------|-----------------------|---------------------|------|------|------|------|
| 45 | 269368 | T                            | C          | missense<br>variant   | KHVJ166             | 0.16 | 0.84 | 0.01 | 0.99 |
| 46 | 270260 | A                            | AGAGGCAGAG | inframe<br>insertion  | KHVJ166/KH<br>VJ167 | 0.06 | 0.94 | 0.15 | 0.85 |
| 47 | 270518 | C                            | CT         | frameshift<br>variant | KHVJ166/KH<br>VJ167 | 0.10 | 0.90 | 0.03 | 0.97 |
| 48 | 270520 | G                            | GCCCTT     | frameshift<br>variant | KHVJ166/KH<br>VJ167 | 0.09 | 0.91 | 0.15 | 0.85 |
| 49 | 270562 | C                            | T          | missense<br>variant   | KHVJ166/KH<br>VJ167 | 0.01 | 0.99 | 0.14 | 0.86 |
| 50 | 270749 | C                            | CACAGACT   | intergenic<br>variant | KHVJ167-<br>KHVJ168 | 0.07 | 0.93 | 0.03 | 0.97 |
| 51 | 270789 | A                            | AGC        | intergenic<br>variant | KHVJ167-<br>KHVJ168 | 0.14 | 0.86 | 0.05 | 0.95 |
| 52 | 270792 | CT                           | C          | intergenic<br>variant | KHVJ167-<br>KHVJ168 | 0.14 | 0.86 | 0.14 | 0.86 |
| 53 | 270796 | AGC                          | A          | intergenic<br>variant | KHVJ167-<br>KHVJ168 | 0.12 | 0.88 | 0.14 | 0.86 |
| 54 | 270801 | C                            | CT         | intergenic<br>variant | KHVJ167-<br>KHVJ168 | 0.11 | 0.89 | 0.14 | 0.86 |
| 55 | 270911 | GACAGAGAC<br>ACAAGACAG<br>AC | G          | intergenic<br>variant | KHVJ167-<br>KHVJ168 | 0.00 | 1.00 | 0.16 | 0.84 |
| 56 | 271009 | C                            | CAA        | intergenic<br>variant | KHVJ167-<br>KHVJ168 | 0.00 | 1.00 | 0.00 | 1.00 |
| 57 | 271715 | TTCAGTGTCC<br>TCC            | T          | inframe<br>deletion   | KHVJ168             | 0.68 | 0.32 | 0.00 | 1.00 |
| 58 | 274370 | AATC                         | A          | intergenic<br>variant | KHVJ170-<br>KHVJ171 | 0.25 | 0.75 | 0.67 | 0.33 |

All variations located in the terminal repeats appear only once. Predicted ORFs were deduced from the genome annotation of KHV-J (AP008984). Missense variant indicates a nucleotide substitution that modifies the amino acid; synonymous variant denotes a nucleotide substitution that does not modify the amino acid; frameshift variant indicates an insertion or a deletion that changes the reading frame; intergenic variant points to a mutation located between two predicted open reading frames. Only variations <100 bp were listed.
